# Supplementary material for: Antifungal Activity and Potential Mechanism of 6,7, 4′-O-Triacetylscutellarein Combined With Fluconazole Against Drug-Resistant C. albicans
Source: PubMed Central journal article supplement (PMC8415886; doi:10.3389/fmicb.2021.692693), 2021-08-17
Supplement: Image_1.pdf [file Image_1.pdf]

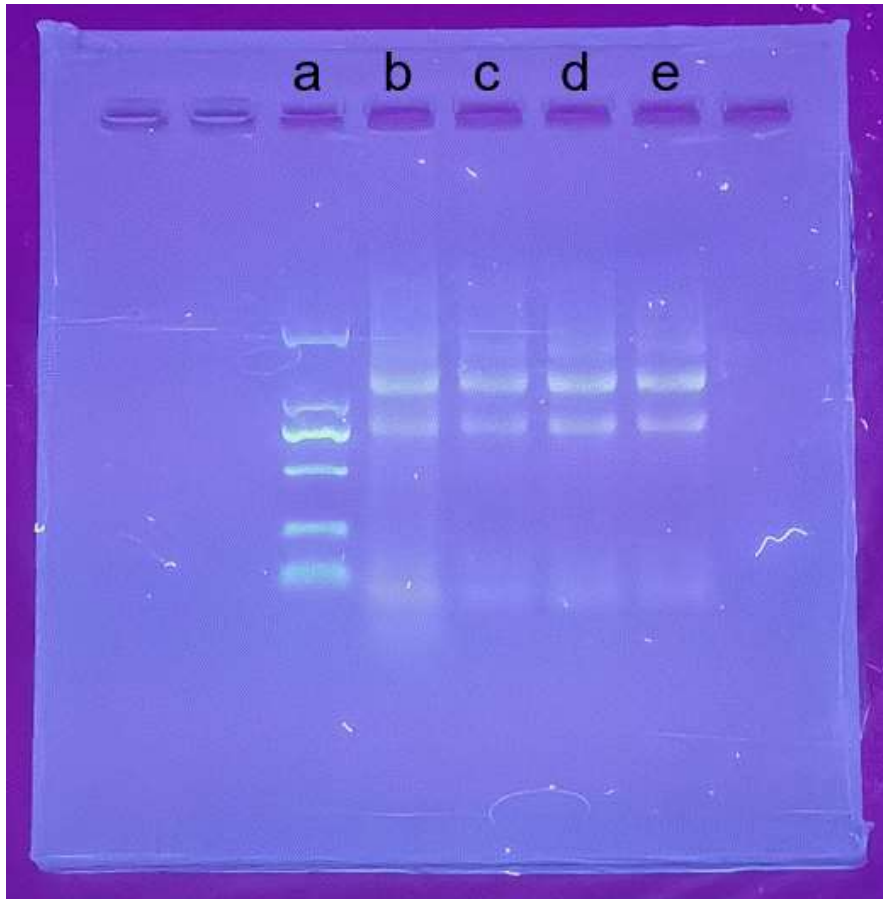

a, Maker; b, TA+FLC group; c, TA group;  
d, FLC group; e, Control group.
